# Supplementary material
Source: ML conference proceedings conference paper supplement (https://openaccess.thecvf.com/content/WACV2023/html/Zhou_SCTS_Instance_Segmentation_WACV_2023_paper.html)
Supplement: Supplementary file 1 [file Zhou_SCTS_Instance_Segmentation_WACV_2023_supplemental.pdf]

# Supplementary Material

## 1. Discussion

We discuss here some of the limitations of the model. First, due to the large downsampling factor used for semantic segmentation, some small objects will disappear on the semantic feature map, which will affect the detection performance of small objects. Several examples are shown in Figure 1, ovals highlight some poor segmentation cases with small objects, and the area of these cases is mostly smaller than  $18 \times 18$  pixels. Another limitation is that at extremely high cell densities, it is still difficult for our model to accurately distinguish cell boundaries by embedding three classes of semantic features. Several examples are shown in Figure 2, ovals highlight some poor segmentation cases at extremely high cell densities. An interesting future direction is to close this gap by embedding distance-based or gradient-based instance representations, which we will investigate in follow-up research.

## 2. Implementation Details

Our method is extended based on two open source code libraries, MMDetection and Detectron2. The experiments on the HEK293T dataset are based on MMDetection, and the experiments on the LIVECell dataset are based on Detectron2. Table 1 show the detailed parameter settings for experiments on HEK293T dataset. For HEK293T dataset, the model using SGD as optimizer required only 24 training epochs, while the model using AdamW as optimizer required 36 training epochs. Table 2 show the detailed parameter settings for experiments on LIVECell dataset.

## 3. More Visualization Results

Figure 3 shows some examples of space-filling augmentation processing results. Figure 4 shows qualitative results of our method on different cell types in the LIVECell dataset.

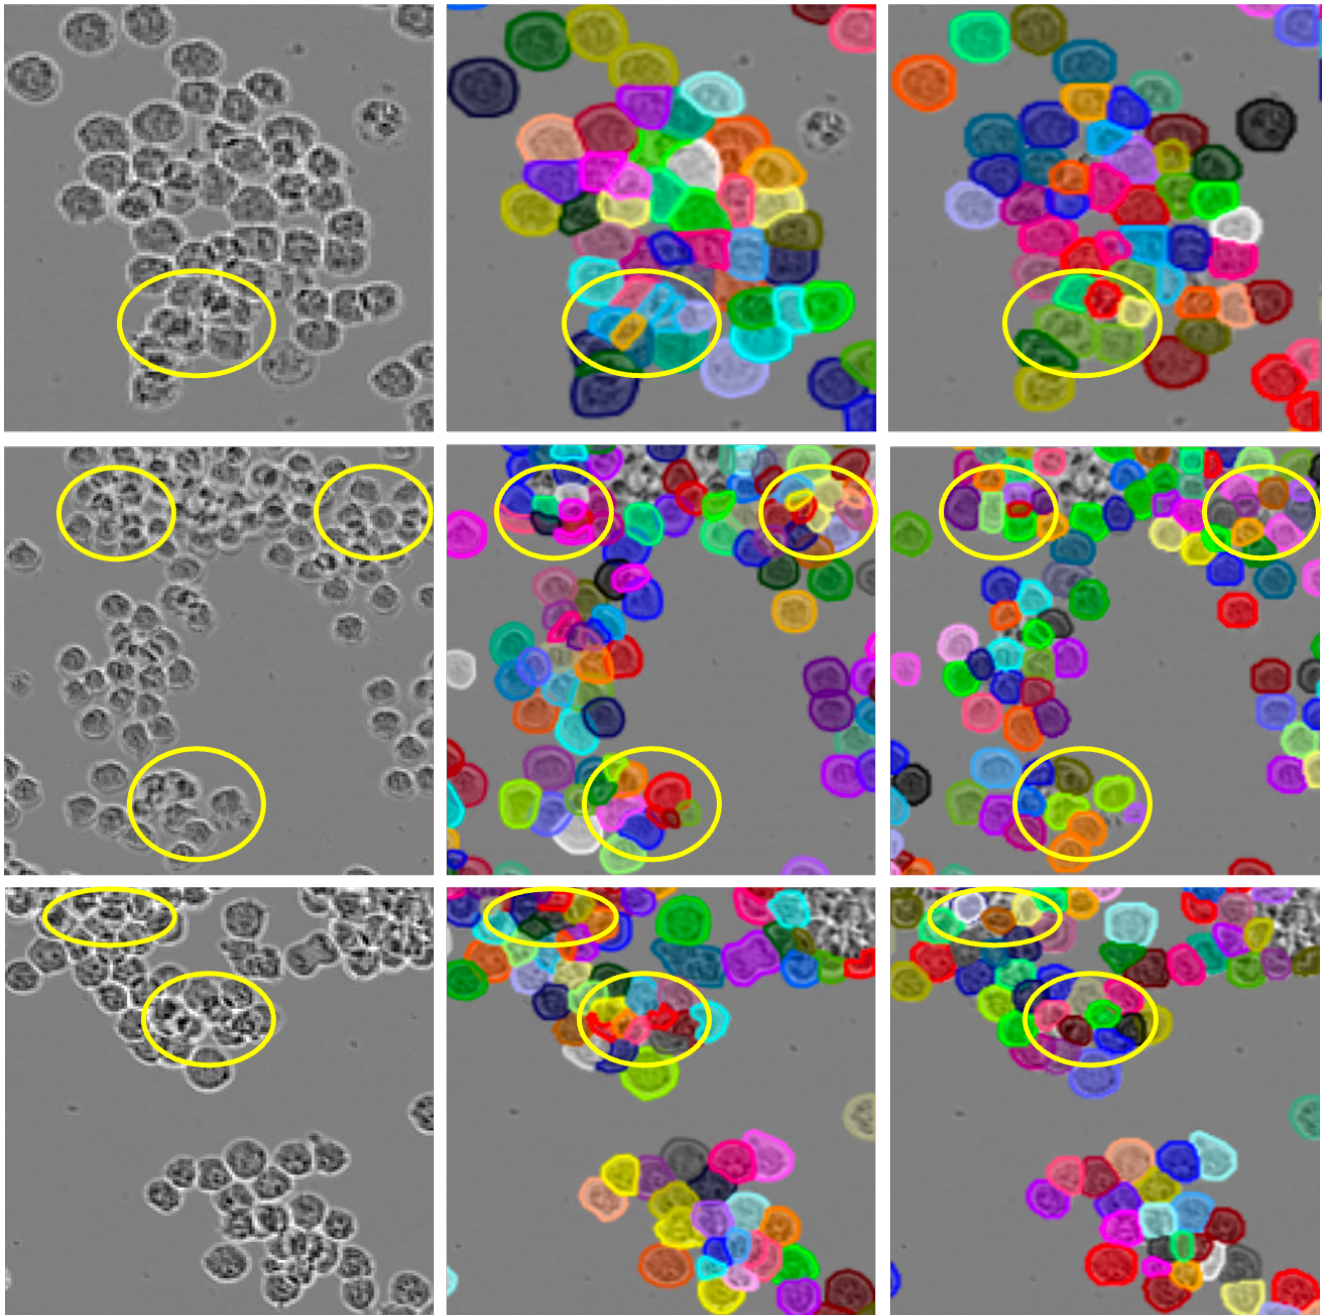

Raw Images

Ground Truth

SCTS

Figure 1: Examples of poor segmentation of small objects. Oval highlights specific cases.

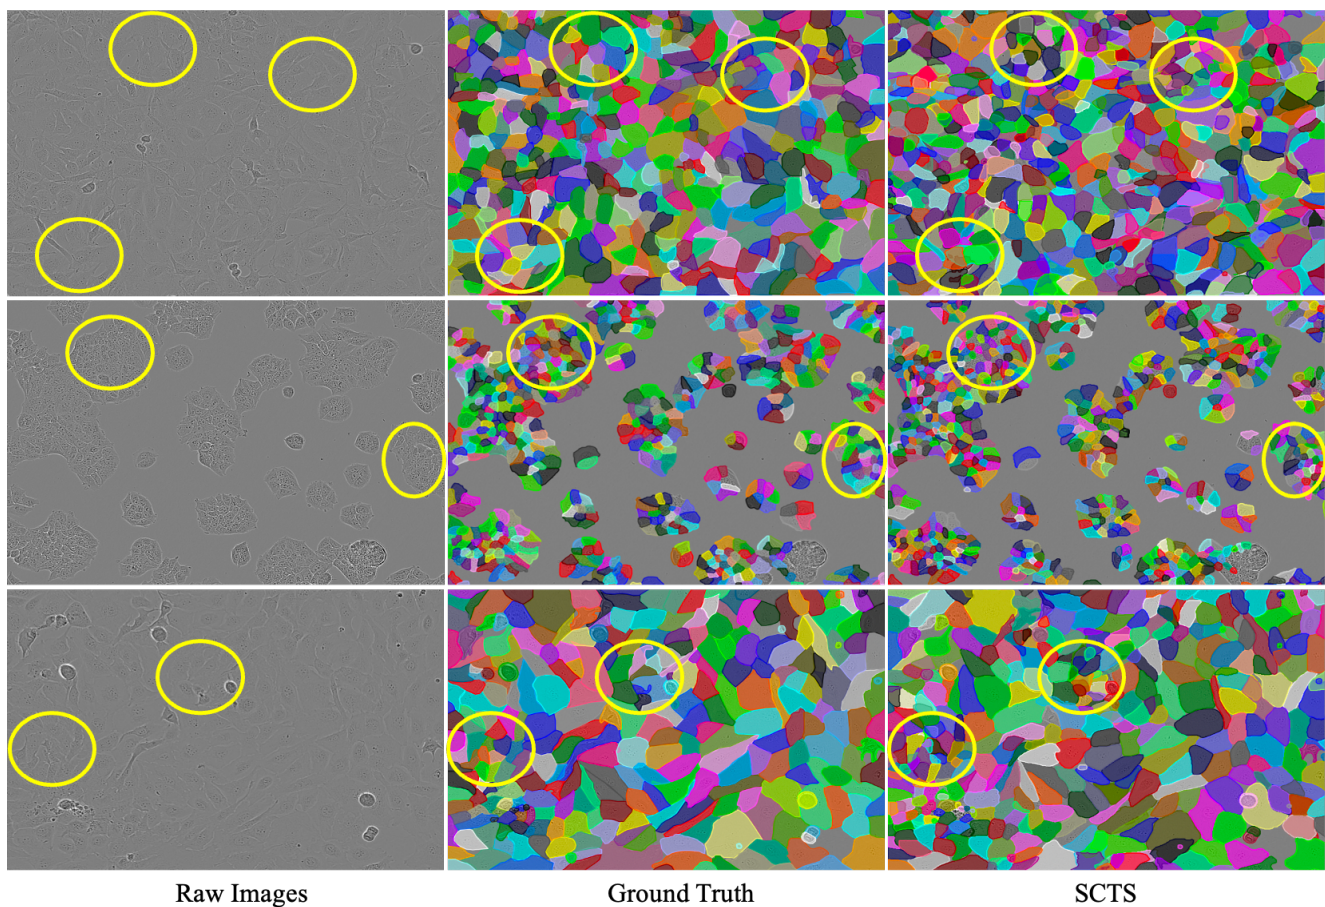

Figure 2: Examples of poor segmentation at extremely high cell densities. Oval highlights specific cases.

| Method              | Backbone    | Pretrain | Multi Scale | Batch Size       | Epochs | Optimizer | LR     |
|---------------------|-------------|----------|-------------|------------------|--------|-----------|--------|
| Mask R-CNN          | ResNet50    | ImageNet | False       | 4 images per gpu | 24     | SGD       | 0.002  |
| Mask R-CNN          | ResNeST-50  | ImageNet | False       | 4 images per gpu | 24     | SGD       | 0.002  |
| Mask R-CNN          | Swin-Tiny   | ImageNet | False       | 4 images per gpu | 36     | AdamW     | 0.0001 |
| PointRend           | ResNet-50   | ImageNet | False       | 4 images per gpu | 24     | SGD       | 0.002  |
| MViTv2              | MViTv2-Tiny | ImageNet | False       | 4 images per gpu | 36     | AdamW     | 0.0001 |
| SCTS                | Swin-Tiny   | ImageNet | False       | 4 images per gpu | 36     | AdamW     | 0.0001 |
| Cascade Mask R-CNN  | ResNet-50   | ImageNet | False       | 4 images per gpu | 24     | SGD       | 0.002  |
| Cascade Mask R-CNN  | ResNeST-50  | ImageNet | False       | 4 images per gpu | 24     | SGD       | 0.002  |
| Hybrid Task Cascade | ResNet-50   | ImageNet | False       | 4 images per gpu | 24     | SGD       | 0.002  |
| Cascade SCTS        | Swin-Tiny   | ImageNet | False       | 4 images per gpu | 36     | AdamW     | 0.0001 |

Table 1: Detailed parameter settings for experiments on the HEK293T dataset.



| Method              | Backbone        | Pretrain | Multi Scale | Batch Size       | Epochs | Optimizer | LR     |
|---------------------|-----------------|----------|-------------|------------------|--------|-----------|--------|
| Mask R-CNN          | ResNet-50       | ImageNet | True        | 2 images per gpu | 140    | SGD       | 0.002  |
| Mask R-CNN          | ResNeST-50      | ImageNet | True        | 2 images per gpu | 140    | SGD       | 0.002  |
| Mask R-CNN          | Swin-Tiny       | ImageNet | True        | 2 images per gpu | 140    | AdamW     | 0.0001 |
| PointRend           | ResNet-50       | ImageNet | True        | 2 images per gpu | 140    | SGD       | 0.002  |
| MViTv2              | MViTv2-Tiny     | ImageNet | True        | 2 images per gpu | 140    | AdamW     | 0.0001 |
| SCTS                | Swin-Tiny       | ImageNet | True        | 2 images per gpu | 140    | AdamW     | 0.0001 |
| Cascade Mask R-CNN  | ResNet-50       | ImageNet | True        | 2 images per gpu | 140    | SGD       | 0.002  |
| Cascade Mask R-CNN  | ResNeST-50      | ImageNet | True        | 2 images per gpu | 140    | SGD       | 0.002  |
| Cascade Mask R-CNN  | ResNeST-200-DCN | ImageNet | True        | 2 images per gpu | 140    | SGD       | 0.002  |
| Hybrid Task Cascade | ResNet-50       | ImageNet | True        | 2 images per gpu | 140    | SGD       | 0.002  |
| Cascade SCTS        | Swin-Tiny       | ImageNet | True        | 2 images per gpu | 140    | AdamW     | 0.0001 |

Table 2: Detailed parameter settings for experiments on the LIVECell dataset.

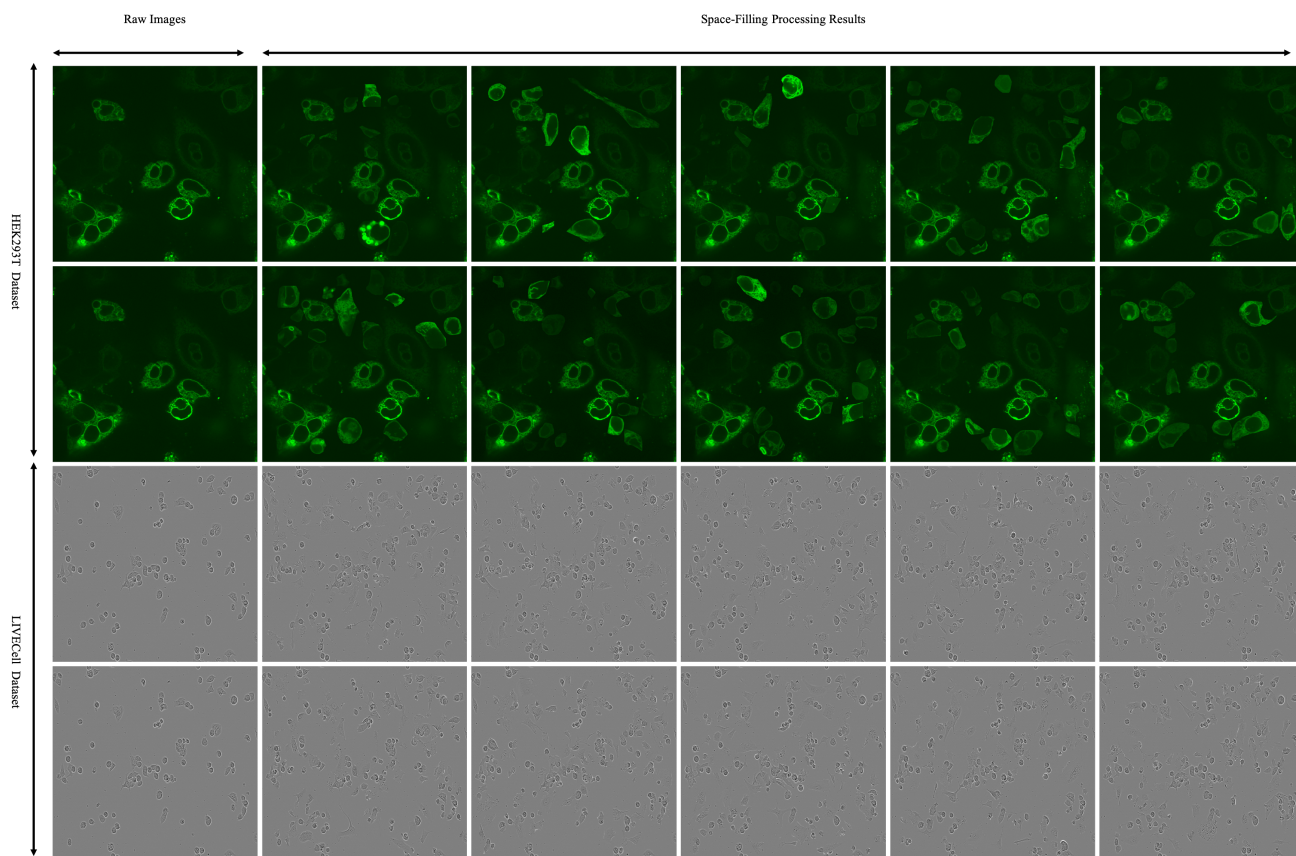

Figure 3: Example of space-filling augmentation processing results.



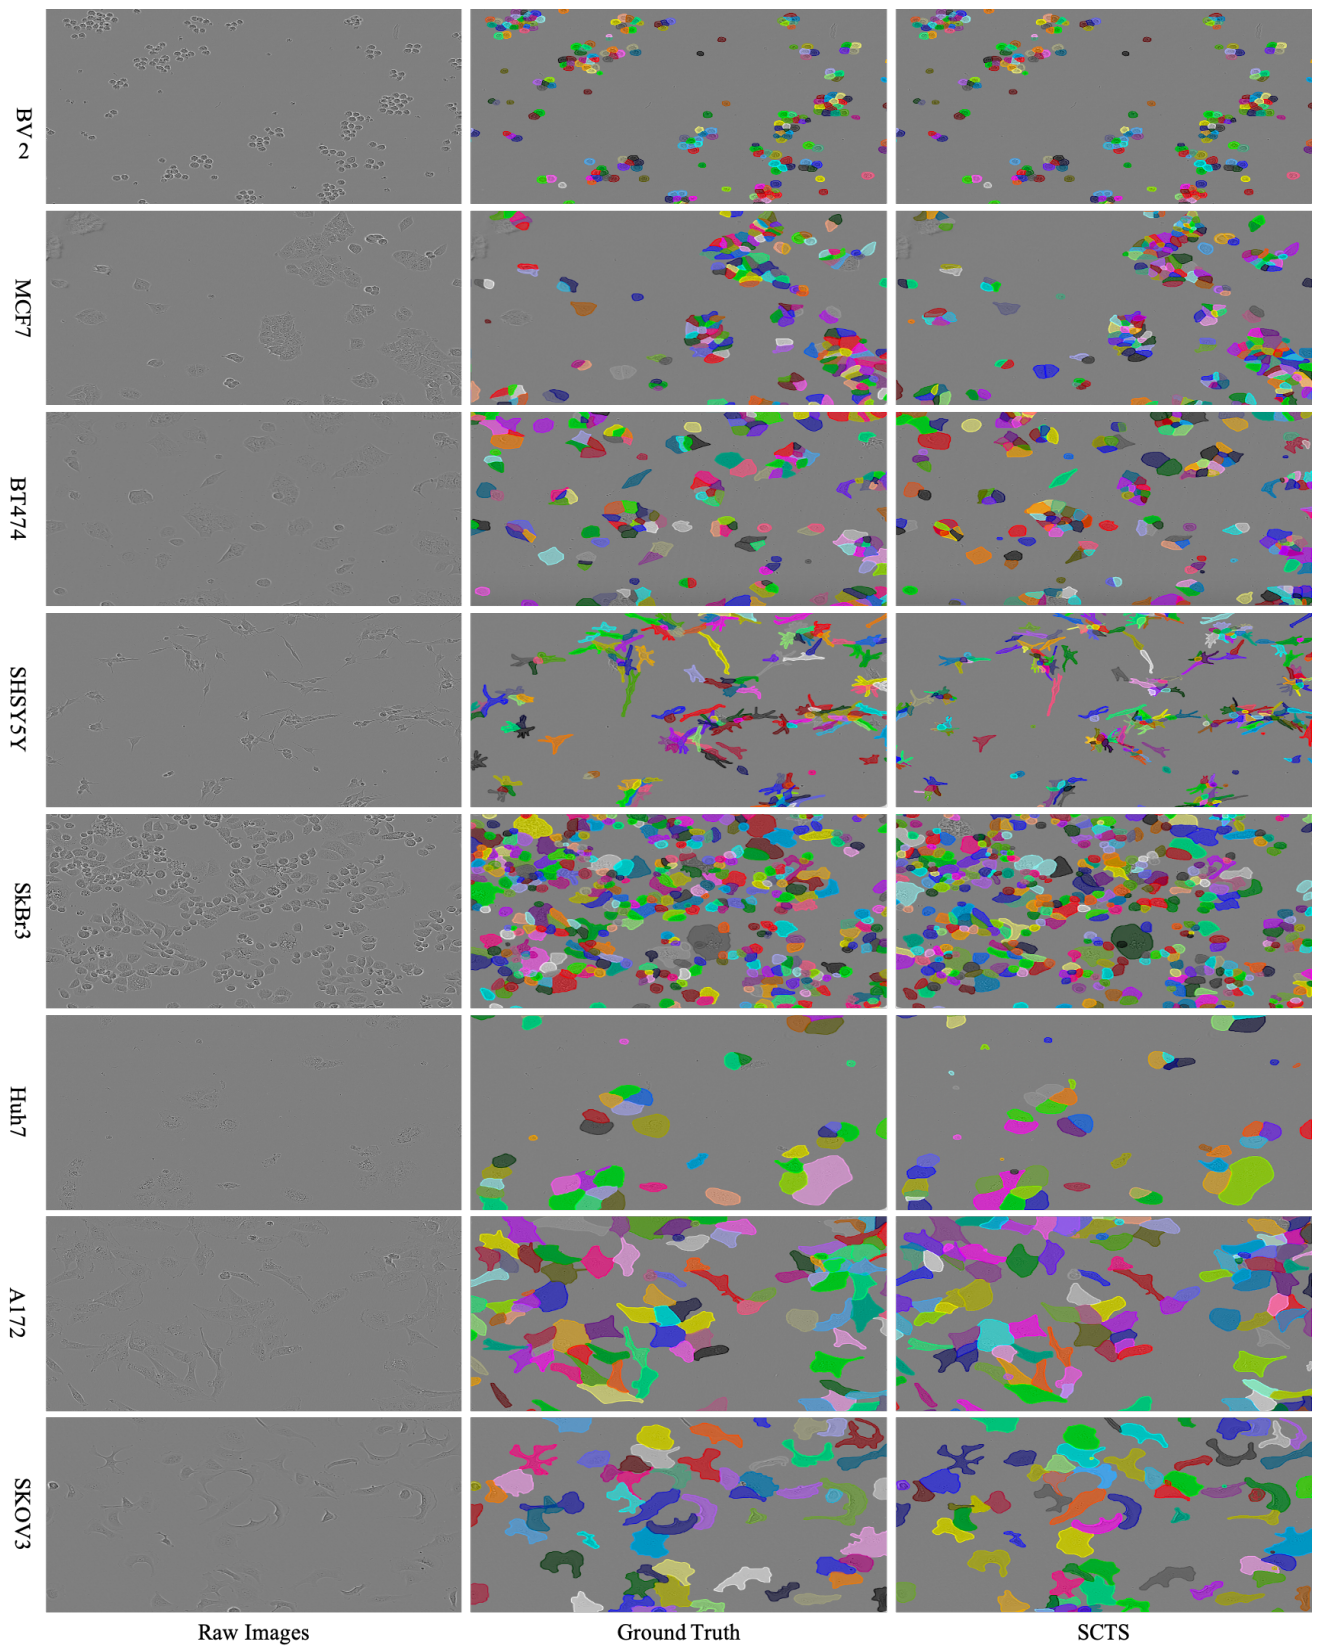

Figure 4: Qualitative results of our method on different cell types in the LIVECell dataset.
